# Supplementary material for: Complete APTX deletion in a patient with ataxia with oculomotor apraxia type 1
Source: PubMed Central journal article supplement (PMC4593195; doi:10.1186/s12881-015-0213-y), 2015-08-19
Supplement: 12881_2015_213_MOESM1_ESM.pdf [file 12881_2015_213_MOESM1_ESM.pdf]

Additional file 1

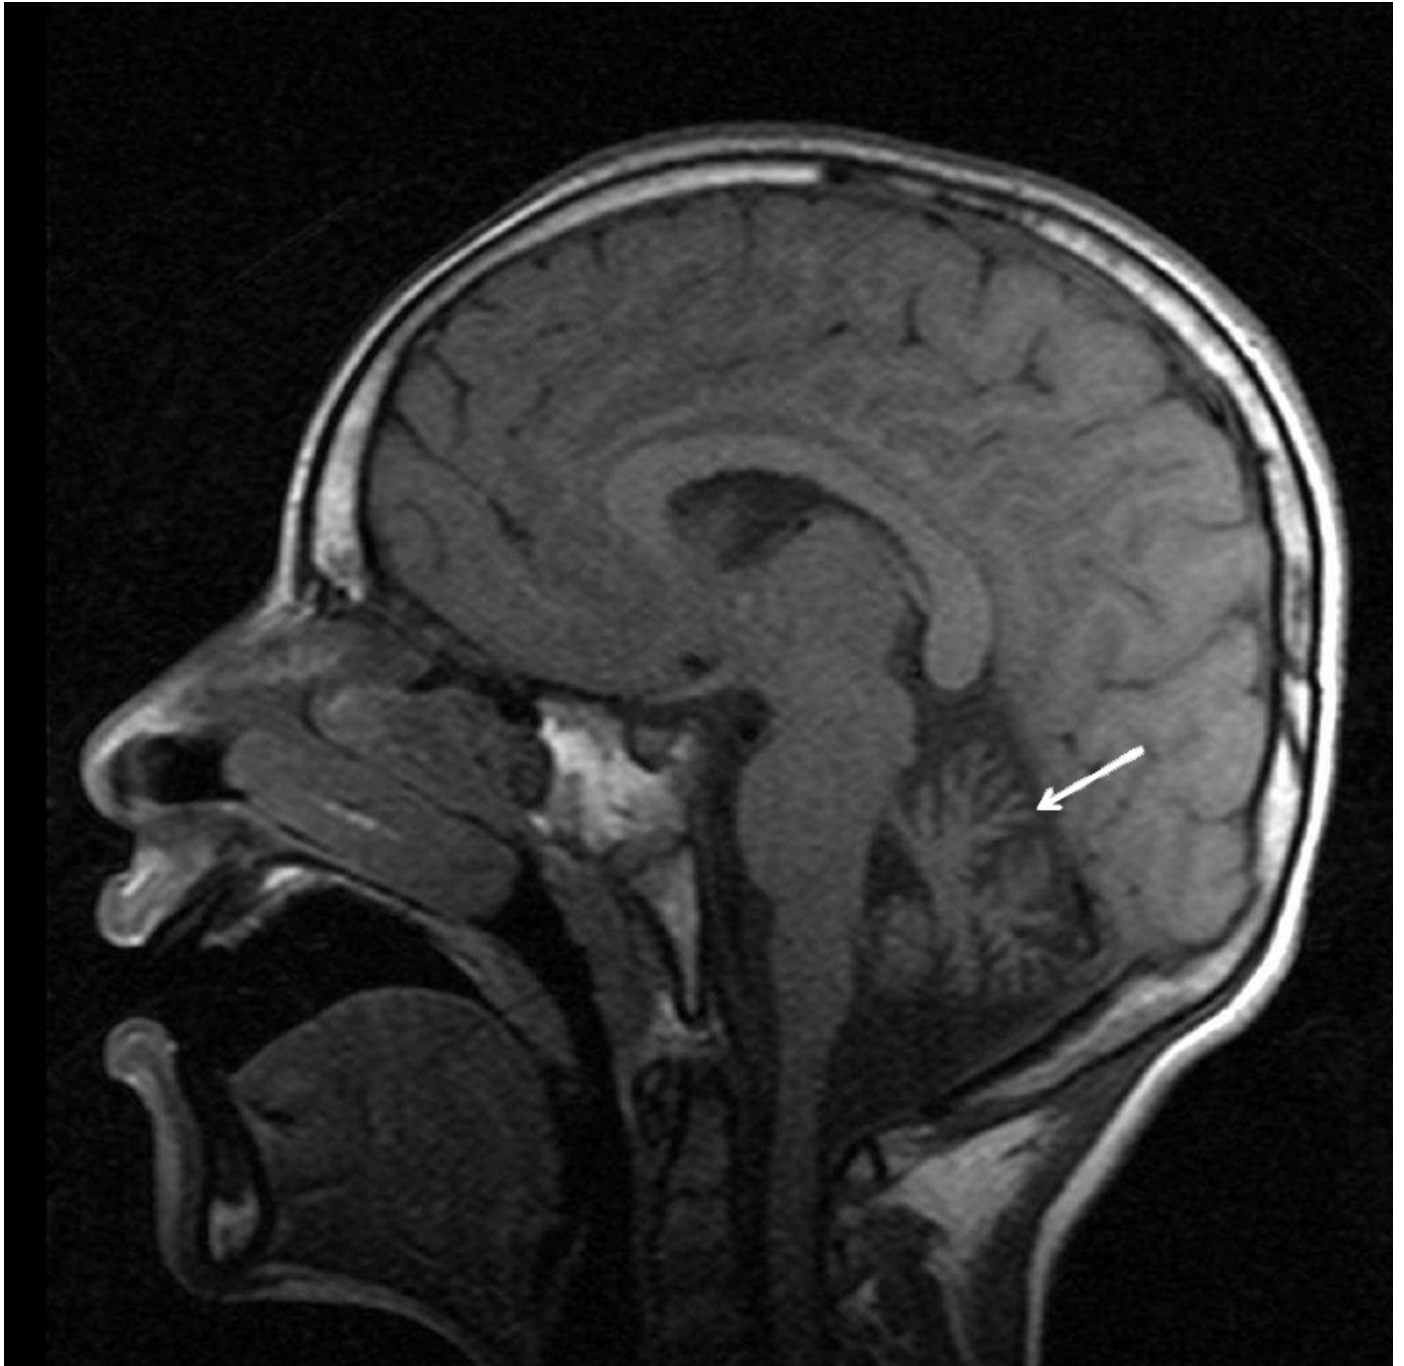

MRI scan of index patient showing atrophy (white arrow)
