# Supplementary material for: Complete APTX deletion in a patient with ataxia with oculomotor apraxia type 1
Source: PubMed Central journal article supplement (PMC4593195; doi:10.1186/s12881-015-0213-y), 2015-08-19
Supplement: 12881_2015_213_MOESM2_ESM.pdf [file 12881_2015_213_MOESM2_ESM.pdf]

## Additional file 2

Novel APTX variants found in 158 index patients

| ID    | HGVS nucleotide change<br>NM_175073.2 | HGVS protein change | Exon | Pathogenicity*            |
|-------|---------------------------------------|---------------------|------|---------------------------|
| 27908 | c.847A>G                              | p.(Asn283Asp)       | 8    | 3 (uncertain)             |
| 18647 | c.940_956del17                        | p.(Lys314fs)        | 9B   | 5 (pathogenic)            |
| 23006 | c.742T>A                              | p.(Leu248Met)       | 7    | 3 (uncertain)             |
| 4305  | c.211G>T                              | p.(Val71Phe)        | 5B   | 3 (uncertain)             |
| 23263 | c.971A>T                              | p.(Gln324Leu)       | 9B   | 1 (not pathogenic)        |
| 27320 | c.559C>T                              | p.(Gln187*)         | 7    | 5 (pathogenic)            |
| 53383 | c.318C>T                              | p.(=)               | 5B   | 2 (likely not pathogenic) |
| 61291 | c.203T>C                              | p.(Ile68Thr)        | 5B   | 3 (uncertain)             |
| 62385 | c.18G>T                               | p.(Trp6Cys)         | 3    | 3 (uncertain)             |

\* The software program Alamut version 2 (Interactive Biosoftware, Rouen, France) was used to help determine the pathogenicity of sequence variants as was previously described in detail in the supplemental data (pages 16-18) of Clin Genet. 2014 Apr;85(4):318-27.
